# Supplementary material for: Empirical model for backscattering polarimetric variables in rain at W-band: motivation and implications
Source: Copernicus journal article supplement (doi:10.5194/amt-18-1621-2025), 2025-04-10
Supplement: Supplementary file 1 [file amt-18-1621-2025-supplement.zip]

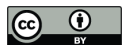

*Supplement of*

## **Empirical model for backscattering polarimetric variables in rain at W-band: motivation and implications**

**Alexander Myagkov et al.**

*Correspondence to:* Alexander Myagkov ([alexander.myagkov@radiometer-physics.de](mailto:alexander.myagkov@radiometer-physics.de))

- [amt-18-1621-2025-supplement-title-page.pdf](#)
- [apply\\_nn.m](#)
- [nn\\_coefficients.mat](#)
- [readme.txt](#)

The copyright of individual parts of the supplement might differ from the article licence.
